# Supplementary material
Source: ML conference proceedings conference paper supplement (https://openaccess.thecvf.com/content/cvpr_2017/html/Zhu_Event-Based_Visual_Inertial_2017_CVPR_paper.html)
Supplement: Supplementary file 2 [file Zhu_Event-Based_Visual_Inertial_2017_CVPR_supplemental.zip.zip]

Archive with 2 entries (2 files):
- evio.mp4
- evio_supplemental.pdf
